# Supplementary material
Source: MDPI journal article supplement (https://www.mdpi.com/2073-4395/8/7/109)
Supplement: s1 [file s1]

## Supplementary Material

Table 1S Characteristics of the root system of the five wheat cultivars used in this study. Data are from a previous semi-hydroponic phenotyping study, measured in four plants per genotype at the onset of tillering (Z2.1)

| Name        | Seminal root number | Total root length (cm plant <sup>-1</sup> ) | Root biomass (mg plant <sup>-1</sup> ) | Maximum root depth (cm) | Root size category |
|-------------|---------------------|---------------------------------------------|----------------------------------------|-------------------------|--------------------|
| Bahatans-87 | 12                  | 3191                                        | 278                                    | 123                     | Large              |
| Ghurka      | 10                  | 3104                                        | 293                                    | 122                     | Large              |
| Hartog      | 10                  | 1926                                        | 138                                    | 109                     | Medium             |
| Harper      | 9                   | 915                                         | 55                                     | 85                      | Small              |
| Tincurrin   | 6                   | 670                                         | 51                                     | 86                      | Small              |

**Table 2S** Cumulative root length of five cultivars measured by root mapping (non-invasive) at 7, 14, 21, 28, 35, 42, 49, 56 and 63 days after sowing (DAS).

| Cultivars    | Cumulative root length (m) |        |        |        |        |         |         |          |          |
|--------------|----------------------------|--------|--------|--------|--------|---------|---------|----------|----------|
|              | 7 DAS                      | 14 DAS | 21 DAS | 28 DAS | 35 DAS | 42 DAS  | 49 DAS  | 56 DAS   | 63 DAS   |
| Ghurka       | 0.31                       | 0.81   | 1.42   | 2.24   | 3.46 b | 6.28 ab | 8.06 ab | 10.78 ab | 11.94 ab |
| Tincurrin    | 0.22                       | 0.52   | 1.09   | 1.85   | 3.36 b | 6.10 ab | 7.59 ab | 8.32 c   | 10.07 cd |
| Hartog       | 0.29                       | 0.75   | 1.23   | 1.95   | 3.33 b | 5.78 ab | 6.98 b  | 7.40 c   | 9.08 d   |
| Harper       | 0.30                       | 0.62   | 0.97   | 1.52   | 3.05 b | 5.24 b  | 7.27 b  | 9.41 b   | 10.75 bc |
| Bahatans-87  | 0.26                       | 0.76   | 1.45   | 2.13   | 4.50 a | 7.13 a  | 8.84 a  | 10.93 a  | 12.50 a  |
| LSD $P<0.05$ | ns                         | ns     | ns     | ns     | 1.01   | 1.51    | 1.29    | 1.39     | 1.55     |

Data with the same letter indicate no significant difference between cultivars ( $P<0.05$ ), ns= not significant.

**Table 3S.** Root biomass (RB), root length density (RLD) and specific root length (SRL) down the soil profile at harvest at 63 DAS. Measurements were made destructively in 0.2 m sections from the top to the bottom of each rhizobox.

| Soil depth (m) | Cultivar     | RB (g) | RLD (cm cm <sup>-3</sup> ) | SRL (m g <sup>-1</sup> ) |
|----------------|--------------|--------|----------------------------|--------------------------|
| 0 - 0.2        | Ghurka       | 0.84 a | 21.84 ab                   | 172 d                    |
|                | Tinticurrin  | 0.48 b | 17.21 cd                   | 240 a                    |
|                | Hartog       | 0.52 b | 15.94 d                    | 206 bc                   |
|                | Harper       | 0.70 a | 21.06 bc                   | 181 cd                   |
|                | Bahatans-87  | 0.72 a | 25.67 a                    | 215 ab                   |
|                | LSD $P<0.05$ | 0.18   | 4.09                       | 33                       |

|           |              |         |          |        |
|-----------|--------------|---------|----------|--------|
| 0.2 - 0.4 | Ghurka       | 0.66 a  | 12.39 a  | 125 bc |
|           | Tinticurrin  | 0.36 c  | 9.41 b   | 177 a  |
|           | Hartog       | 0.44 bc | 10.10 b  | 157 ab |
|           | Harper       | 0.44 bc | 11.46 ab | 159 ab |
|           | Bahatans-87  | 0.58 ab | 9.90 b   | 104 c  |
|           | LSD $P<0.05$ | 0.18    | 2.08     | 43     |
| 0.4-0.6   | Ghurka       | 0.28 b  | 6.24 a   | 118 ab |
|           | Tinticurrin  | 0.18 bc | 4.77 ab  | 168 a  |
|           | Hartog       | 0.15 c  | 3.30 b   | 150 ab |
|           | Harper       | 0.25 b  | 5.48 ab  | 130 ab |
|           | Bahatans-87  | 0.47 a  | 6.91 a   | 90 b   |
|           | LSD $P<0.05$ | 0.17    | 2.72     | 63     |
| 0.6-0.8   | Ghurka       | 0.07 b  | 0.73 b   | 79     |
|           | Tinticurrin  | 0.03 b  | 0.53 b   | 83     |
|           | Hartog       | 0.01 b  | 0.12 b   | 69     |
|           | Harper       | 0.04 b  | 0.39 b   | 71     |
|           | Bahatans-87  | 0.18 a  | 3.60 a   | 91     |
|           | LSD $P<0.05$ | 0.17    | 1.87     | ns     |
| 0.8 - 1.0 | Ghurka       | 0       | 0.02     |        |
|           | Tinticurrin  | 0       | 0.00     |        |
|           | Hartog       | 0       | 0.00     |        |
|           | Harper       | 0       | 0.00     |        |
|           | Bahatans-87  | 0.02    | 0.18     | 40     |
|           | LSD $P<0.05$ | 0.02    | 0.17     | ns     |

Data with the same letter indicate no significant difference between cultivars ( $P<0.05$ ), ns= not significant.

Mineral composition of the tap water

| Parameter                                                                          | Units    | LOR          |
|------------------------------------------------------------------------------------|----------|--------------|
| <b>pH in water Method: AN101</b>                                                   |          |              |
| pH                                                                                 | pH Units | 0.1 7.5      |
| <b>Conductivity and TDS by Calculation - Water Method: AN106</b>                   |          |              |
| Conductivity @ 25 C                                                                | µS/cm    | 2 870        |
| <b>Total Dissolved Solids (TDS) in water Method: AN113</b>                         |          |              |
| Total Dissolved Solids Dried at 180°C                                              | mg/L     | 10 430       |
| <b>Alkalinity Method: AN135</b>                                                    |          |              |
| Total Alkalinity as CaCO <sub>3</sub>                                              | mg/L     | 5 70         |
| Hydroxide Alkalinity as OH <sup>-</sup>                                            | mg/L     | 5 <5         |
| Carbonate Alkalinity as CO <sub>3</sub> <sup>2-</sup>                              | mg/L     | 1 <1         |
| Bicarbonate Alkalinity as HCO <sub>3</sub> <sup>-</sup>                            | mg/L     | 5 86         |
| <b>Fluoride by Ion Selective Electrode in Water Method: AN141</b>                  |          |              |
| Fluoride by ISE                                                                    | mg/L     | 0.1 0.7      |
| <b>Chloride by Discrete Analyser in Water Method: AN274</b>                        |          |              |
| Chloride                                                                           | mg/L     | 1 220        |
| <b>Sulphate in water Method: AN275</b>                                             |          |              |
| Sulphate                                                                           | mg/L     | 1 19         |
| <b>Nitrate Nitrogen and Nitrite Nitrogen (NO<sub>x</sub>) by FIA Method: AN253</b> |          |              |
| Nitrate, NO <sub>3</sub> as NO <sub>3</sub>                                        | mg/L     | 0.05 <0.05   |
| <b>Low Level Ammonia Nitrogen by FIA Method: AN261</b>                             |          |              |
| Ammonia Nitrogen, NH <sub>3</sub> as N                                             | mg/L     | 0.005 <0.005 |
| <b>Metals in Water (Dissolved) by ICPOES Method: AN320/AN321</b>                   |          |              |
| Aluminium, Al                                                                      | mg/L     | 0.02 <0.02   |
| Barium, Ba                                                                         | mg/L     | 0.01 0.10    |
| Calcium, Ca                                                                        | mg/L     | 0.2 18       |
| Iron, Fe                                                                           | mg/L     | 0.02 <0.02   |
| Lead, Pb                                                                           | mg/L     | 0.005 <0.005 |
| Magnesium, Mg                                                                      | mg/L     | 0.1 6.2      |
| Manganese, Mn                                                                      | mg/L     | 0.005 <0.005 |
| Potassium, K                                                                       | mg/L     | 0.1 5.3      |
| Silica, Soluble                                                                    | mg/L     | 0.05 6.7     |
| Silicon, Si                                                                        | mg/L     | 0.02 3.1     |
| Sodium, Na                                                                         | mg/L     | 0.5 140      |
| Strontium, Sr                                                                      | mg/L     | 0.005 0.18   |
